# Supplementary material
Source: publisher figshare collection journal article supplement (https://sage.figshare.com/ndownloader/files/14399426)
Supplement: Supplementary file 1 [file 14399426]

## Sheet: Detailed information
Supplemental table D: Detailed data from included studies
Physical symptoms
Symptom	Study	Country	Setting	Design	Quality	Comparator	N frail	N comparator	Measurement tool	Interpretation of measurement score	Prevalence of symptom in frail group	Measurement tool score for frail group	Prevalence of symptom in comparator group	Measurement tool score for comparator group	p Value	Adjusted analysis	Adjusted prevalence	Adjusted effect size	95% Confidence interval for estimate
Composite physical distress	Ryan 2013	UK	Hospitals	Cross sectional	Poor	Cancer	49	33	Proportion of participants expressing significant distress in at least one item of physical burden from the SPARC index (Proportion, n %)	Higher is worse	34 (70%)	-	25 (78%)	-	-	Logistic regression adjusted for proxy status (frailty only)		0.77	(0.37 - 1.61)
Pain	Wachterman 2016	USA	Mixed settings including hospitals	Cross sectional	Good	Cancer	9931	23523	Family reported frequent uncontrolled pain	Higher is worse	0.533	-	0.55	-	0.001	Proportion adjusted for age, race sex next of kin relationship and comorbidity, clustered by facility. Effect adjusted for palliative consultation, place of death and DNR order	Frail = 52.3% Cancer = 55.9%	-	-
Pain	Chochinov 2016	Canada	Mixed settings including hospitals	Cross sectional	Good	ALS COPD ESRD	102	101 100 101	ESAS (mean, sd)	Higher is worse	-	2.7 (3.1)	-	2.3 (2.6) 3.5 (3.6) 3.0 (3.2)	NS	-	-	-	-
Pain	Smith 2010	USA	Population level	Prospective cohort	Good	Cancer	555	1298	Self report (prevalence at 2 years) Self report (prevalence 1 year) Self report (prevalence 4 months) Self report (prevalence last month of life)	Higher is worse	30 (25-35) 31 (26-36) 31 (25-38) 50 (40-60)		25 (21-30) 26 (23-30) 27 (23-32) 45 (36-54)	-	0.079	Prevalence adjusted for age, sex, race, education, net worth, diagnosis, proxy, arthritis	-	-	-
Pain	Munoz 2008	Spain	Hospitals	Cross sectional	Poor	None	40	-	ESYP form (reporting a lot or quite a lot of problems, n,%)	Higher is worse	9 (22.5%)	-	-	-	-	no	-	-	-
Pain	Pollack 2017	USA	Hospitals	Cross sectional	Fair	Non-frail	~107	~18	ESAS (median score, IQR)	Higher is worse	-	3 (0-6)	-	2 (0-5)	0.43	no	-	-	-
Nausea	Chochinov 2016	Canada	Mixed settings including hospitals	Cross sectional	Good	ALS COPD ESRD	102	101 100 101	ESAS (mean, sd)	Higher is worse	-	0.7 (1.6)	-	0.5 (1.4) 0.8 (1.8) 1.0 (2.1)	NS	no	-	-	-
Nausea	Pollack 2017	USA	Hospitals	Cross sectional	Fair	Non-frail	~107	~18	ESAS (median score, IQR)	Higher is worse	-	0 (0-1)	-	0 (0-0)	0.35	no	-	-	-
Nausea	Munoz 2008	Spain	Hospitals	Cross sectional	Poor	None	40	-	ESYP form (reporting a lot or quite a lot of problems, n,%)	Higher is worse	1 (2.5%)		-	-	-	no	-	-	-
Drowsiness	Chochinov 2016	Canada	Mixed settings including hospitals	Cross sectional	Good	ALS COPD ESRD	102	101 100 101	ESAS (mean, sd)	Higher is worse	-	1.6 (2.4)	-	2.1 (2.7) 2.4 (2.9) 2.5 (2.8)	NS	no	-	-	-
Drowsiness	Pollack 2017	USA	Hospitals	Cross sectional	Fair	Non-frail	~107	~18	ESAS (median score, IQR)	Higher is worse	-	4 (0 -6)	-	0 (0-3)	0.002	no	-	-	-
Constipation	Chochinov 2016	Canada	Mixed settings including hospitals	Cross sectional	Good	ALS COPD ESRD	102	101 100 101	ESAS (mean, sd)	Higher is worse	-	1.8 (2.8)	-	1.8 (2.8) 1.6 (2.9) 1.4 (2.6)	NS	no	-	-	-
Constipation	Munoz 2008	Spain	Hospitals	Cross sectional	Poor	None	40	-	ESYP form (reporting a lot or quite a lot of problems, n,%)	Higher is worse	5 (12.5%)	-	-	-	-	no	-	-	-
Difficulty thinking	Chochinov 2016	Canada	Mixed settings including hospitals	Cross sectional	Good	ALS COPD ESRD	102	101 100 101	ESAS (mean, sd)	Higher is worse	-	1.3 (2.5)	0.7 (1.5) 0.9 (2.1) 1.0 (2.0)	-	NS	no	-	-	-
Difficulty thinking	Munoz 2008	Spain	Hospitals	Cross sectional	Poor	-	40		ESYP form (reporting a lot or quite a lot of problems, n,%)	Higher is worse	0 (0)	-	-	-	-	no	-	-	-
Shortness of breath	Chochinov 2016	Canada	Mixed settings including hospitals	Cross sectional	Good	ALS COPD ESRD	102	101 100 101	ESAS (mean, sd)	Higher is worse	-	1.1 (1.9)	-	2.9 (3.0) 6.0 (3.0) 1.5 (2.3)	<0.001	no	-	-	-
Shortness of breath	Munoz 2008	Spain	Hospitals	Cross sectional	Poor	None	40	-	ESYP form (reporting a lot or quite a lot of problems, n,%)	Higher is worse	18 (45%)		-		-
Shortness of breath	Pollack 2017	USA	Hospitals	Cross sectional	Fair	Non-frail	~107	~18	ESAS (median score, IQR)	Higher is worse	-	5 (0-7)	-	2 (0-5)	0.07	no	-	-	-
Fatigue/weakness	Chochinov 2016	Canada	Mixed settings including hospitals	Cross sectional	Good	ALS COPD ESRD	102	101 100 101	ESAS (mean, sd)	Higher is worse	-	2.6 (2.9)	-	5.6 (3.3) 3.5 (3.1) 3.2 (3.0)	<0.001	no	-
Fatigue/weakness	Pollack 2017	USA	Hospitals	Cross sectional	Fair	Non-frail	~107	~18	ESAS (median score, IQR)	Higher is worse	-	5 (4-8)	-	2 (0-5)	<0.001	no	-	-	-
Fatigue/weakness	Munoz 2008	Spain	Hospitals	Cross sectional	Poor	None	40	-	ESYP form (reporting a lot or quite a lot of problems, n,%)	Higher is worse	12 (30%)	-	-	-	-	no	-
Loss of appetite	Munoz 2008	Spain	Hospitals	Cross sectional	Poor	-	40	-	ESYP form (reporting a lot or quite a lot of problems, n,%)	Higher is worse	15 (37.5%)		-		-	no	-	-	-
Loss of appetite	Pollack 2017	USA	Hospitals	Cross sectional	Fair	Non-frail	~107	~18	ESAS (median score, IQR)	Higher is worse	-	3 (0-6)	-	2 (0-5)	0.14	no	-	-	-
Pressure ulcers	Amblas-Novellas 2016	Spain	Hospitals	Cross sectional	Fair	Cancer Organ failure Dementia	377	76 126 203	Presence recorded in medical records (n,%)	Higher is worse	11 (3%)	-	19 (9.3%) 1 (0.8%) 3 (4%)	-	<0.005	no	-	-	-
Sleeplessness	Munoz 2008	Spain	Hospitals	Cross sectional	Poor	None	40	-	ESYP form (reporting a lot or quite a lot of problems, n,%)	Higher is worse	11 (27.5%)	-	-	-	-	-	-	-	-
Hearing problems	Munoz 2008	Spain	Hospitals	Cross sectional	Poor	None	40	-	ESYP form (reporting a lot or quite a lot of problems, n,%)	Higher is worse	10 (25%)	-	-	-	-	-	-	-	-
Sight problems	Munoz 2008	Spain	Hospitals	Cross sectional	Poor	None	40	-	ESYP form (reporting a lot or quite a lot of problems, n,%)	Higher is worse	4 (10%)	-	-	-	-	-	-	-	-
Speech problems	Munoz 2008	Spain	Hospitals	Cross sectional	Poor	None	40	-	ESYP form (reporting a lot or quite a lot of problems, n,%)	Higher is worse	2 (5%)	-	-	-	-	-	-	-	-
Weight loss	Munoz 2008	Spain	Hospitals	Cross sectional	Poor	None	40	-	ESYP form (reporting a lot or quite a lot of problems, n,%)	Higher is worse	8 (20%)	-	-	-	-	-	-	-	-
Cough	Munoz 2008	Spain	Hospitals	Cross sectional	Poor	None	40	-	ESYP form (reporting a lot or quite a lot of problems, n,%)	Higher is worse	5 (12.5%)	-	-	-	-	-	-	-	-
Sleepiness	Munoz 2008	Spain	Hospitals	Cross sectional	Poor	None	40	-	ESYP form (reporting a lot or quite a lot of problems, n,%)	Higher is worse	4 (10%)	-	-	-	-	-	-	-	-
Discomfort in mouth	Munoz 2008	Spain	Hospitals	Cross sectional	Poor	None	40	-	ESYP form (reporting a lot or quite a lot of problems, n,%)	Higher is worse	2 (5%)	-	-	-	-	-	-	-	-
Pain when swallowing	Munoz 2008	Spain	Hospitals	Cross sectional	Poor	None	40	-	ESYP form (reporting a lot or quite a lot of problems, n,%)	Higher is worse	2 (5%)	-	-	-	-	-	-	-	-
Urinary incontinence	Munoz 2008	Spain	Hospitals	Cross sectional	Poor	None	40	-	ESYP form (reporting a lot or quite a lot of problems, n,%)	Higher is worse	2 (5%)	-	-	-	-	-	-	-	-
Rectal incontinence	Munoz 2008	Spain	Hospitals	Cross sectional	Poor	None	40	-	ESYP form (reporting a lot or quite a lot of problems, n,%)	Higher is worse	2 (5%)	-	-	-	-	-	-	-	-
Discomfort with cures	Munoz 2008	Spain	Hospitals	Cross sectional	Poor	None	40	-	ESYP form (reporting a lot or quite a lot of problems, n,%)	Higher is worse	2 (5%)	-	-	-	-	-	-	-	-
Noncompliance (problems taking medication as indicated)	Munoz 2008	Spain	Hospitals	Cross sectional	Poor	None	40	-	ESYP form (reporting a lot or quite a lot of problems, n,%)	Higher is worse	2 (5%)	-	-	-	-	-	-	-	-
Lack of concentration	Munoz 2008	Spain	Hospitals	Cross sectional	Poor	None	40	-	ESYP form (reporting a lot or quite a lot of problems, n,%)	Higher is worse	2 (5%)	-	-	-	-	-	-	-	-
Thinking difficulties	Munoz 2008	Spain	Hospitals	Cross sectional	Poor	None	40	-	ESYP form (reporting a lot or quite a lot of problems, n,%)	Higher is worse	0 (0%)	-	-	-	-	-	-	-	-
Itchiness	Munoz 2008	Spain	Hospitals	Cross sectional	Poor	None	40	-	ESYP form (reporting a lot or quite a lot of problems, n,%)	Higher is worse	0 (0%)	-	-	-	-	-	-	-	-
Paralysis	Munoz 2008	Spain	Hospitals	Cross sectional	Poor	None	40	-	ESYP form (reporting a lot or quite a lot of problems, n,%)	Higher is worse	0 (0%)	-	-	-	-	-	-	-	-
Feeling smelly	Munoz 2008	Spain	Hospitals	Cross sectional	Poor	None	40	-	ESYP form (reporting a lot or quite a lot of problems, n,%)	Higher is worse	0 (0%)	-	-	-	-	-	-	-	-
Diarrhoea	Munoz 2008	Spain	Hospitals	Cross sectional	Poor	None	40	-	ESYP form (reporting a lot or quite a lot of problems, n,%)	Higher is worse	0 (0%)	-	-	-	-	-	-	-	-
Haemorrhage	Munoz 2008	Spain	Hospitals	Cross sectional	Poor	None	40	-	ESYP form (reporting a lot or quite a lot of problems, n,%)	Higher is worse	0 (0%)	-	-	-	-	-	-	-	-
Irritability	Munoz 2008	Spain	Hospitals	Cross sectional	Poor	None	40	-	ESYP form (reporting a lot or quite a lot of problems, n,%)	Higher is worse	0 (0%)	-	-	-	-	-	-	-	-
Concern about appearance	Munoz 2008	Spain	Hospitals	Cross sectional	Poor	None	40	-	ESYP form (reporting a lot or quite a lot of problems, n,%)	Higher is worse	0 (0%)	-	-	-	-	-	-	-	-
Spiritual concerns	Munoz 2008	Spain	Hospitals	Cross sectional	Poor	None	40	-	ESYP form (reporting a lot or quite a lot of problems, n,%)	Higher is worse	0 (0%)	-	-	-	-	-	-	-	-
Psychosocial need
Symptom	Study	Country	Setting	Design	Quality	Comparator	N frail	N comparator	Measurement tool	Interpretation of measurement score	Prevalence of symptom in frail group	Measurement tool score for frail group	Prevalence of symptom in comparator group	Measurement tool score for comparator group	p Value	Adjusted analysis	Adjusted prevalence	Adjusted effect size	95% Confidence interval for estimate
Composite emotional distress	Pollack 2017	USA	Hospitals	Cross sectional	Fair	Non-frail	~107	~18	ESAS (median score, IQR)	Higher is worse	-	6 (0-11)	-	0 (0-4)	0.02	no	-	-	-
Composite emotional distress	Ryan 2013	UK	Hospitals	Cross sectional	Poor	Cancer	49	33	SPARC (Proportion, n %)	Higher is worse	26 (53%)	-	13 (39%)	-	-	Logistic regression adjusted for proxy status (frailty only)		1.61	(0.83 - 3.12)
Composite emotional distress	Soto rubio 2017	Spain	Hospitals	Cross sectional	Poor	None	40 (no cognitive impairment)	-	HADS (Proportion with significant levels of global emotional distress)	Higher is worse	0.25	-	-	-	-	-	-	-	-
Composite emotional distress	Soto rubio 2017	Spain	Hospitals	Cross sectional	Poor	None	45 (cognitively impaired)	-	DOS (Proportion with high levels of discomfort)	Higher is worse	0.422	-	-	-	-	-		-	-
Composite emotional distress	Amblas-Novellas 2016	Spain	Hospitals	Cross sectional	Fair	Cancer Organ failure Dementia	377	76 126 203	NECPAL Presence of emotional distress with psychological symptoms not related to acute concurrent conditions (n,%)	Higher is worse	84 (23.8%)	-	20 (24.7%) 28 (22.6%) 33 (16.2%)	-	0.134	-	-	-	-
Depression	Pollack 2017	USA	Hospitals	Cross sectional	Fair	Non-frail	~107	~18	ESAS (median score, IQR)	Higher is worse	-	3 (0-6)	-	0 (0-2)	0.05	no	-	-	-
Anxiety	Pollack 2017	USA	Hospitals	Cross sectional	Fair	Non-frail	~107	~18	ESAS (median score, IQR)	Higher is worse	-	3 (0-6)	-	0 (0-3)	0.03	no	-	-	-
Anxiety	Chochinov 2016	Canada	Mixed settings including hospitals	Cross sectional	Good	ALS COPD ESRD	102	101 100 101	ESAS (mean, sd)	Higher is worse	-	1.4 (2.3)	-	2.4 (2.6) 3.4 (3.4) 1.7 (2.5)	<0.001		-
Wellbeing	Pollack 2017	USA	Hospitals	Cross sectional	Fair	Non-frail	~107	~18	ESAS (median score, IQR)	Higher is worse	-	5 (3-7)	-	0.5 (0-4)	<0.001	no	-	-	-
Wellbeing	Chochinov 2016	Canada	Mixed settings including hospitals	Cross sectional	Good	ALS COPD ESRD	102	101 100 101	ESAS (mean, sd)	Lowest is worse	-	7.9 (2.6)	-	7.3 (3.0) 7.4 (2.7) 7.8 (2.4)	NS
Social support	Chochinov 2016	Canada	Mixed settings including hospitals	Cross sectional	Good	ALS COPD ESRD	102	101 100 101	MSPSS (mean, sd)	Lowest is worse	-	66.8 (12.4)	-	74.6 (10.5) 69.6 (12.0) 69.4 (11.8)	<0.001	no	-	-	-
Hope	Chochinov 2016	Canada	Mixed settings including hospitals	Cross sectional	Good	ALS COPD ESRD	102	101 100 101	Hope Hearth Index (mean, sd)	Lowest is worse	-	35.9 (6.0)	-	37.4 (4.7) 37.8 (5.0) 39.0 (5.5)	0.008	no	-	-	-
Desire for death	Chochinov 2016	Canada	Mixed settings including hospitals	Cross sectional	Good	ALS COPD ESRD	102	101 100 101	SISC questionnaire (%with moderate to extreme distress)	Higher is worse	0.0791	-	2.92% 2.03% 1.04%	-	0.04	no	-	-	-
Will to live	Chochinov 2016	Canada	Mixed settings including hospitals	Cross sectional	Good	ALS COPD ESRD	102	101 100 101	ESAS (mean, sd)	Lowest is worse	-	8.8 (2.6)	-	8.4 (2.9) 9.2 (2.0) 8.9 (2.3)	NS	no	-	-	-
Loss of dignity	Chochinov 2016	Canada	Mixed settings including hospitals	Cross sectional	Good	ALS COPD ESRD	102	101 100 101	SISC questionnaire (%with moderate to extreme distress)	Higher is worse	0.0602	-	11.01% 4.03% 4.03%	-	NS	no	-	-	-
Suffering	Chochinov 2016	Canada	Mixed settings including hospitals	Cross sectional	Good	ALS COPD ESRD	102	101 100 101	SISC questionnaire (%with moderate to extreme distress)	Higher is worse	0.1202	-	12.81% 10.23% 5.94%	-	NS	no	-	-	-
Hopelessness	Chochinov 2016	Canada	Mixed settings including hospitals	Cross sectional	Good	ALS COPD ESRD	102	101 100 101	SISC questionnaire (%with moderate to extreme distress)	Higher is worse	0.0503	-	8.71% 8.22% 4.04%	-	NS	no	-	-	-
Suicidal	Chochinov 2016	Canada	Mixed settings including hospitals	Cross sectional	Good	ALS COPD ESRD	102	101 100 101	SISC questionnaire (%with moderate to extreme distress)	Higher is worse	0	-	0% 0% 5.91%	-	<0.001	no	-	-	-
General dissatisfaction	Chochinov 2016	Canada	Mixed settings including hospitals	Cross sectional	Good	ALS COPD ESRD	102	101 100 101	SISC questionnaire (%with moderate to extreme distress)	Higher is worse	0.0204	-	3.03% 5.21% 4.02%	-	NS	no	-	-	-
Sadness	Munoz 2008	Spain	Hospitals	Cross sectional	Poor	None	40	-	ESYP form (reporting a lot or quite a lot of problems, n,%)	Higher is worse	8 (20%)	-	-	-	-	no	-	-	-
Nervousness	Munoz 2008	Spain	Hospitals	Cross sectional	Poor	None	40	-	ESYP form (reporting a lot or quite a lot of problems, n,%)	Higher is worse	7 (17.5%)	-	-	-	-	no	-	-	-
Loneliness	Munoz 2008	Spain	Hospitals	Cross sectional	Poor	None	40	-	ESYP form (reporting a lot or quite a lot of problems, n,%)	Higher is worse	5 (12.5%)	-	-	-	-	no	-	-	-
Fear	Munoz 2008	Spain	Hospitals	Cross sectional	Poor	None	40	-	ESYP form (reporting a lot or quite a lot of problems, n,%)	Higher is worse	2 (5%)	-	-	-	-	no	-	-	-
Feeling smelly	Munoz 2008	Spain	Hospitals	Cross sectional	Poor	None	40	-	ESYP form (reporting a lot or quite a lot of problems, n,%)	Higher is worse	0 (0%)	-	-	-	-	no	-	-	-
Concern about appearance	Munoz 2008	Spain	Hospitals	Cross sectional	Poor	None	40	-	ESYP form (reporting a lot or quite a lot of problems, n,%)	Higher is worse	0 (0%)	-	-	-	-	no	-	-	-
Spiritual concerns	Munoz 2008	Spain	Hospitals	Cross sectional	Poor	None	40	-	ESYP form (reporting a lot or quite a lot of problems, n,%)	Higher is worse	0 (0%)	-	-	-	-	no	-	-	-
Death distress	Chibnall	USA	Hospitals	Cross sectional	Poor	Cancer Cardiac Pulmonary Liver/Kidney HIV/AIDS	23	16 10 3 3 12	Death Anxiety Scale (Bivariate correlation: frail vs other diagnosis)	-	r=-0.14	-	-	-	0.26	no	-	-	-
Functional status
Measure	Study	Country	Setting	Design	Quality	Comparator	N frail	N comparator	Measurement tool	Interpretation of measurement score	Prevalence of symptom in frail group	Measurement tool score for frail group	Prevalence of symptom in comparator group	Measurement tool score for comparator group	p Value	Cognitive impairment	Adjusted prevalence	Adjusted effect size	95% Confidence interval for estimate
Functional dependence	Soto rubio 2017	Spain	Hospitals	Cross sectional	Poor	None	85 (40 no cognitive impairment, 45 cognitive impairment)	-	Barthel function independence scale - "totally dependent" (%)	Higher is worse	0.625	-	-	-	-	52.9% with cognitive impairment	-	-	-
Functional dependence	Pollack 2017	USA	Hospitals	Cross sectional	Fair	Non-frail	~107	~18	Katz ADL score (median, iqr)	Higher is worse	-	1 (0-3)	-	0 (0-0)	-	Excluded dementia Frail patients higher prevalence of cognitive impairment (36% v 6%)	-	-	-
Functional dependence	Huijberts 2016	Netherlands	Hospitals	Prospective cohort	Fair	Cancer Organ failure	57	151 98	Katz ADL and IADL (mean, sd)	Higher is worse	-	10.1 (3.9)	-	4.7 (4.0) 8.1 (4.2)	<0.001	No specific reference to dementia, but patients defined as frail by place of residence (nursing home/sheltered), MMSE<24 or ADL impaired .Delirium: 71.9% vs 21.6%	-	-	-
Functional dependence	Chochinov 2016	Canada	Mixed settings including hospitals	Cross sectional	Good	ALS COPD ESRD	102	101 100 101	Katz ADL (mean, sd)	Higher is worse	-	3.3 (1.5)	-	2.2 (2.1) 0.7 (1.2) 0.4 (1.0)	<0.001	Frail patients had Cognitive Performance Scale (CPS) of zero to three (i.e. none to mild cognitive decline), but having 2+ adl dependencies was part of the inclusion criteria for frailty	-	-	-
Functional dependence	Amblas-Novellas 2016	Spain	Hospitals	Cross sectional	Fair	Cancer Organ failure Dementia	377	76 126 203	Barthel function independence scale <25 (n, %)	Higher is worse	37 (10.6%)	-	3 (4.5%) 6 (5.3%) 101 (49.7%)	-	<0.005	Dementia was a separate diagnostic criteria: 0 patients scored ≥ 6c on the Global Deterioration Scale	-	-	-
Functional dependence	Bagshaw 2014	Canada	Hospitals	Cross sectional (from prospective cohort study)	Good	Non-frail	138	283	CSHA function scale: able to bathe independently (n,%)	lower is worse	79 (57.2%)	-	274 (96.8%)	-	<0.001	Not explicitly excluded. No measure of cognition.	-	-	-
Functional dependence	Bagshaw 2014	Canada	Hospitals	Cross sectional (from prospective cohort study)	Good	Non-frail	138	283	CSHA function scale: walk independently (n,%)	lower is worse	77 (55.8%)	-	259 (91.5%)	-	<0.001	Not explicitly excluded. No measure of cognition.	-	-	-
Functional dependence	Bagshaw 2014	Canada	Hospitals	Cross sectional (from prospective cohort study)	Good	Non-frail	138	283	CSHA function scale: Take medications independently (n,%)	lower is worse	90 (65.2%)	-	270 (95.4%)	-	<0.001	Not explicitly excluded. No measure of cognition.	-	-	-
Functional dependence	Bagshaw 2014	Canada	Hospitals	Cross sectional (from prospective cohort study)	Good	Non-frail	138	283	CSHA function scale: manage finances independently (n,%)	lower is worse	102 (73.9%)	-	273 (96.5%)	-	<0.001	Not explicitly excluded. No measure of cognition.	-	-	-
Functional dependence	Covinsky 2003	USA	Community	Longitudinal	Good	Cognitive impairment	334	583	Became fully dependent on help with bathing in last 2 years of life (assessed by nurse) (%)	Higher is worse	0.3		0.6			All patients frail, comparator group is cognitively impaired	OR for becoming fully depending in last 2 years of life	3.6	2.3-5.8
Functional dependence	Covinsky 2003	USA	Community	Longitudinal	Good	Cognitive impairment	334	583	Became fully dependent on help with eating in last 2 years of life (assessed by nurse) (%)	Higher is worse	0.26		0.49			All patients frail, comparator group is cognitively impaired	OR for becoming fully depending in last 2 years of life	2.6	1.7-3.8
Functional dependence	Covinsky 2003	USA	Community	Longitudinal	Good	Cognitive impairment	334	583	Became fully dependent on help for mobility in last 2 years of life (assessed by nurse) (%)	Higher is worse	0.36		0.56			All patients frail, comparator group is cognitively impaired	OR for becoming fully depending in last 2 years of life	2.4	1.6-3.7
Functional dependence	Covinsky 2003	USA	Community	Longitudinal	Good	Cognitive impairment	334	583	Became fully dependent on help with continence in last 2 years of life (assessed by nurse) (%)	Higher is worse	0.27		0.53			All patients frail, comparator group is cognitively impaired	OR for becoming fully depending in last 2 years of life	3.5	2.3-5.3
Place of death
Measure	Study	Country	Setting	Design	Quality	Comparator	N frail	N comparator	Measurement tool	Interpretation of measurement score	Prevalence of symptom in frail group	Measurement tool score for frail group	Prevalence of symptom in comparator group	Measurement tool score for comparator group	p Value	Adjusted analysis	Adjusted prevalence	Adjusted effect size	95% Confidence interval for estimate
ICU	Wachterman 2016	USA	Mixed settings including hospitals	Cross sectional	Good	Cancer	9931	23523	Place of death abstracted from medical records (n,%)	-	3301 (33.2%)	-	3447 (14.6%)	-	-	Only investigating Veterans Affairs facilities		-	-
ICU	Bagshaw 2014	Canada	Hospitals	Cross sectional (from prospective cohort study)	Good	Non-frail	138	283	Died in ICU following ICU admission (n, %)		16 (11.6%)	-	27 (9.5%)	-		Adjusted logistic regression (unclear on what factors in model)		1.37	0.72 - 2.62
Hospital (non ICU)	Wachterman 2016	USA	Mixed settings including hospitals	Cross sectional	Good	Cancer	9931	23523	Place of death abstracted from medical records (n,%)	-	3108 (31.3%)	-	4933 (21.0%)	-	-	Only investigating Veterans Affairs facilities		-	-
Hospital (non ICU)	Hofstede 2016	Netherlands	Mixed settings including hospitals	Cross sectional	Good	Cancer	180	215	Place of death (n,%)		17 (10%)	-	34 (16%)	-				-	-
Hospital (non ICU)	Lavergne 2015	Canada	Population level	Cross sectional	Good	Terminal illness	5117	10445	Place of death from vital statistics records (OR)	-	-	-	-	-	-	Logistic regression adjusted for age and sex (could not differentiate palliative hospital beds from non palliative). Patient preference not captured in data so uncertain as to whether this reflects quality of care		0.67	0.61 - 0.74
Hospital (non ICU)	Bagshaw 2014	Canada	Hospitals	Cross sectional (from prospective cohort study)	Good	Non-frail	138	283	Died in hospital following ICU admission (n, %)		44 (31.9%)	-	45 (15.9%)	-		Adjusted logistic regression (unclear on what factors in model)		1.81	1.09 - 3.01
Nursing home	Wachterman 2016	USA	Mixed settings including hospitals	Cross sectional	Good	Cancer	9931	23523	Place of death abstracted from medical records (n,%)	-	1458 (14.7%)	-	5284 (22.5%)	-	-	Only investigating Veterans Affairs facilities		-	-
Nursing home	Hofstede 2016	Netherlands	Mixed settings including hospitals	Cross sectional	Good	Cancer	180	215	Place of death (n,%)		142 (79%)	-	25 (12%)	-				-	-
Hospice	Wachterman 2016	USA	Mixed settings including hospitals	Cross sectional	Good	Cancer	9931	23523	Place of death abstracted from medical records (n,%)	-	2066 (20.8%)	-	9865 (41.9%)	-	-	Only investigating Veterans Affairs facilities		-	-
Hospice	Hofstede 2016	Netherlands	Mixed settings including hospitals	Cross sectional	Good	Cancer	180	215	Place of death (n,%)		0 (0%)	-	41 (19%)	-	-	-		-	-
Home	Hofstede 2016	Netherlands	Mixed settings including hospitals	Cross sectional	Good	Cancer	180	215	Place of death (n,%)	-	14 (8%)	-	113 (53%)	-	-	-		-	-
Satisfaction/Access
Measure	Study	Country	Setting	Design	Quality	Comparator	N frail	N comparator	Measurement tool	Interpretation of measurement score	Prevalence of symptom in frail group	Measurement tool score for frail group	Prevalence of symptom in comparator group	Measurement tool score for comparator group	p Value	Adjusted analysis	Adjusted prevalence	Adjusted effect size	95% Confidence interval for estimate
Overall rating of relatives care	Wachterman 2016	USA	Mixed settings including hospitals	Cross sectional	Good	Cancer	9931	23523	Bereaved family survey: Likert scale dichotomised to excellent vs non excellent (% rated excellent)	lower is worse	0.548		0.592		<0.001	proportion adjusted for age, race sex next of kin relationship and comorbidity, clustered by facility. Effect adjusted for palliative consultation, place of death and DNR order	-	Frail=56.0 Cancer=56.4	-
Overall rating of relatives care	Hofstede 2016	Netherlands	Mixed settings including hospitals	Cross sectional	Good	Cancer	180	215	Consumer Quality Index Palliative care: general quality of care (mean, sd)	lower is worse	-	8.3 (1.7)	-	8.8 (1.3)	<0.05	Adjusted for age, gender of deceased patient and age/perceived health of relative	-	-	-
Overall rating of relatives care	Hofstede 2016	Netherlands	Mixed settings including hospitals	Cross sectional	Good	Cancer	180	215	Consumer Quality Index Palliative care: general support of healthcare professionals to relatives prior to death of patient (mean, sd)	lower is worse	-	7.9 (1.9)	-	8.4 (1.7)	<0.05	Adjusted for age, gender , education and perceived health of relative	-	-	-
Overall rating of relatives care	Hofstede 2016	Netherlands	Mixed settings including hospitals	Cross sectional	Good	Cancer	180	215	Consumer Quality Index Palliative care: general support of healthcare professionals to relatives after death of patient (mean, sd)	lower is worse	-	7.5 (2.1)	-	7.8 (2.2)	NS	Adjusted for age, gender , education and perceived health of relative	-	-	-
Care in line with preference	Heyland 2016	Canada	Hospitals	Cross sectional	Good	Non-frail	280	521	Likelihood that expressed preferences for care do not align with documented goals of care (OR potential overtreatment in frail vs not frail)	-	-		-		-	OR adjusted for age sex comorbidities marital status, living status, education, race, diagnosis	-	0.7	0.5-0.9
Care in line with preference	Heyland 2015	Canada	Hospitals	Cross sectional	Fair	Non-frail	193	416	Patients with frailty more likely to have limitation of treatment order on admission to ICU and after ICU admission by before discharge. However, frail patients no less likely to receive life sustaining treatment (other than invasive ventilation frail=66% non-frail=75%,p=0.04)	-	-		-		-	-	-	-	-
Care in line with preference	Bagshaw 2014	Canada	Hospitals	Cross sectional (from prospective cohort study)	Good	Non-frail	138	283	Patients with frailty more likely to have imitation of medical therapy at ICU admission (34% vs 12%,p=0.001 but were not any less likely to receive intensive treatment in ICU than non-frail patients)	-	-		-		-	-	-	-	-
Care in line with preference	Ikegami 2010	Japan	Hospitals	Cross sectional	Fair	Cancer	40	75	Family member's preferences for patients life sustaining treatment were followed in detail by the physical (%)	lower is worse	0.75		0.527		0.065	-	-	-	-
Enrolment in palliative care programme	Lavergne 2015	Canada	Population level	Cross sectional	Good	Terminal illness	5117	10445	Likelihood of being enrolled in a palliative care programme	NA	-		-		-	Logistic regression adjusted for age and sex. Patient preference not captured in data so uncertain as to whether this reflects quality of care		0.05	0.04-0.05
Preferences for care
Measure	Study	Country	Setting	Design	Quality	Comparator	N frail	N comparator	Measurement tool	Interpretation of measurement score	Prevalence of symptom in frail group	Measurement tool score for frail group	Prevalence of symptom in comparator group	Measurement tool score for comparator group	p Value	Adjusted analysis	Adjusted prevalence	Adjusted effect size	95% Confidence interval for estimate
Comfort oriented end of life care	Pollack 2017	USA	Hospitals	Cross sectional	Fair	Non-frail	107	18	Asked patient or family	na	83 (81%)		12 (71%)		0.31	no	-	-	-
No chest compressions/breathing machine/unsure	Pollack 2017	USA	Hospitals	Cross sectional	Fair	Non-frail	107	18	Asked patient or family	na	62 (61%)		12 (71%)		0.44	no	-	-	-
Treatment restriction	Huijberts 2016	Netherlands	Hospitals	Prospective cohort	Fair	Cancer Organ failure	57	151 98	Advance Care Planning during hospitalisation: Treatment restriction (%,CI)	na	61.4% (48.4-72.9)		53.6 (45.7-61.4) 52.0 (42.3-61.7)		0.94	-	-	-	-
Palliative approach	Amblas-Novellas 2016	Spain	Hospitals	Cross sectional	Fair	Cancer Organ failure Dementia		76 126 203	Of individuals identified as palliative by NECPAL - Patients also made choice/demand (n,%)	na	21 (5.6%)		13 (17.1%) 7 (5.6%) 3 (1.4%)		<0.005	-	-	-	-
	Amblas-Novellas 2016	Spain	Hospitals	Cross sectional	Fair	Cancer Organ failure Dementia	377	76 126 203	Of individuals identified as palliative by NECPAL - Patient family member also made choice/demand (n,%)	na	80 (21.5%)		30 (39.5%) 30 (23.8%) 69 (34.0%)		<0.005	-	-	-	-
No Treatment	Ernst 2014	USA	Hospitals	Cross sectional or Case control?	Good	Pre frailty screening vs post frailty screening	-		-	na	-		-		-	Palliative care consultations were more likely to be ordered before surgery after the implementation of a frailty screening process (52% pre op 48% post op) than before (26.3% pre op 73.8% post op) leading to an increase in the number of patients declining surgery (5.6% pre implementation vs 19.3% post implementation). Post implementation mean days survival was numerically higher (295, sd=492 pre…	-	-	-
No Treatment	Moorhouse 2012	Canada	Hospitals	Cross sectional	Fair	Clinical Frailty Scale scores (entered as continuous predictor)	NA	NA	Decision to decline scheduled treatment or procedure	na	-	-	-	-		Logistic regression adjusted for age	-	3.41	1.39-8.38
No Treatment	Ikegami 2010	Japan	Hospitals	Cross sectional	Fair	Cancer	39	69	Family member reported that patient did not want life sustaining treatment in any form (%)	na	0.385	-	0.232	-	0.092	-	-	-	-
Resuscitation preference status	Yash Pal 2017	Singapore	Hospital ICU	Cross sectional	Poor	Advanced cancer Organ Failure	43	13 45	Had pre existing resuscitation status (n, %)	na	9 (20.9%)	-	4 (30.8%) 2 (4.4%)	-	-	-	-	-	-
Hospitalisation in prior 6 months	Yash Pal 2017	Singapore	Hospital ICU	Cross sectional	Poor	Advanced cancer Organ Failure	43	13 45	Hospitalised in prior 6 months (n, %)	na	29 (67.4%)	-	10 (76.9%) 25 (55.6%)	-	-	-	-	-	-
Received aggressive resuscitation	Yash Pal 2017	Singapore	Hospital ICU	Cross sectional	Poor	Advanced cancer Organ Failure	43	13 45	Received aggressive resuscitation in admission of death (n, %)	na	26 (60.5%)	-	6 (46.2%) 43 (95.6%)	-	-	-	-	-	-
